# Supplementary material
Source: MDPI journal article supplement (https://www.mdpi.com/2410-3888/9/3/87)
Supplement: s1 [file s1]

## Supplementary Materials

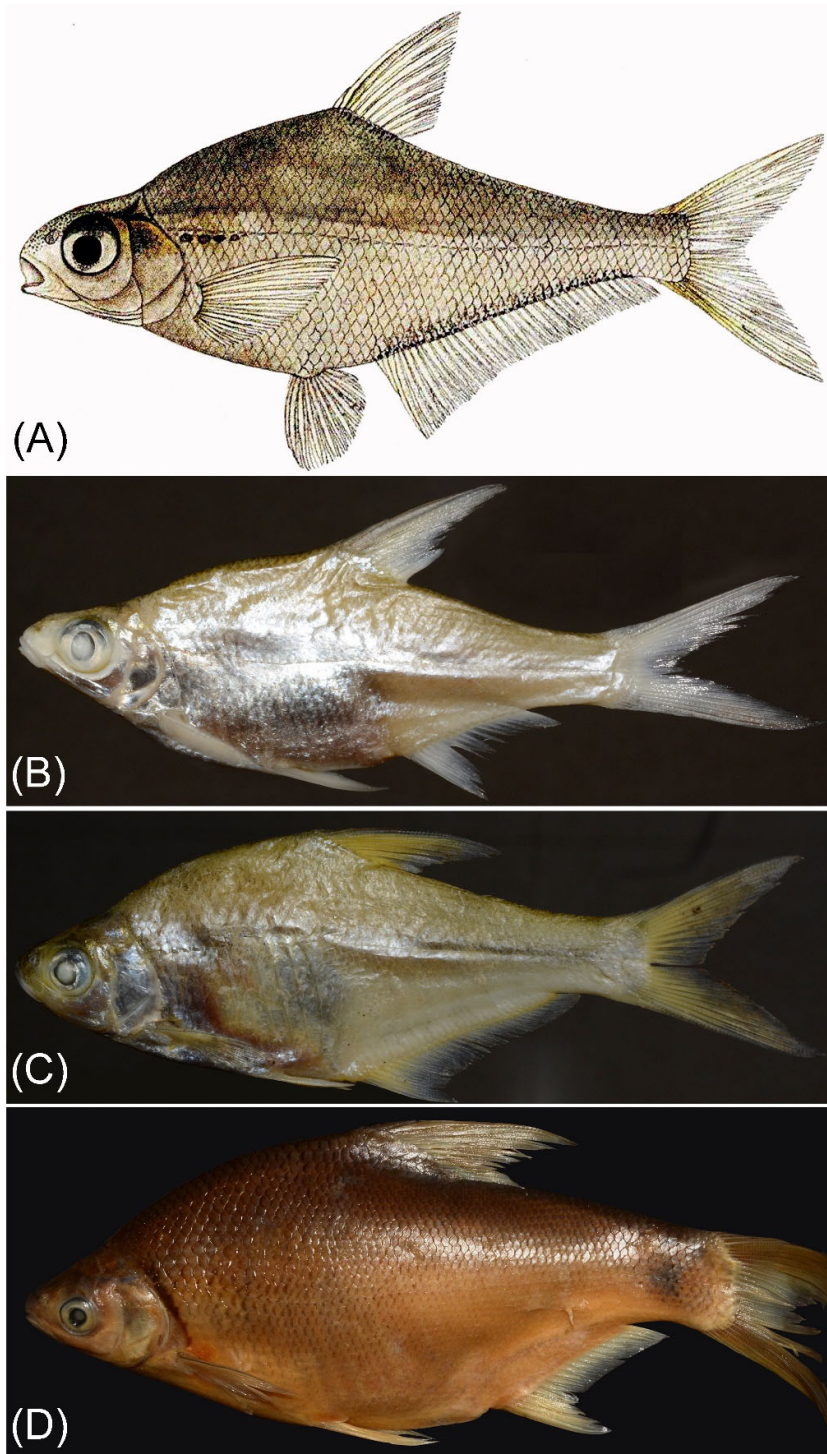

**Figure S1.** (A) *Osteobrama cotio*, reproduced from Hamilton plate 207; (B) *Osteobrama neilli*, FBRC/ZSI/F/3548, 68.0 mm SL; India: Telangana, Nagarkurnool District, Krishna River: near Somasila; (C) *Osteobrama peninsularis*, FBRC/ZSI/F/3549, India; Telangana, Wyra lake, Khamam District; (D) *Osteobrama dayi*, FBRC-ZSI-F 3795, India: Telangana, Godavari River. Photo credit @Boni Amin Laskar.

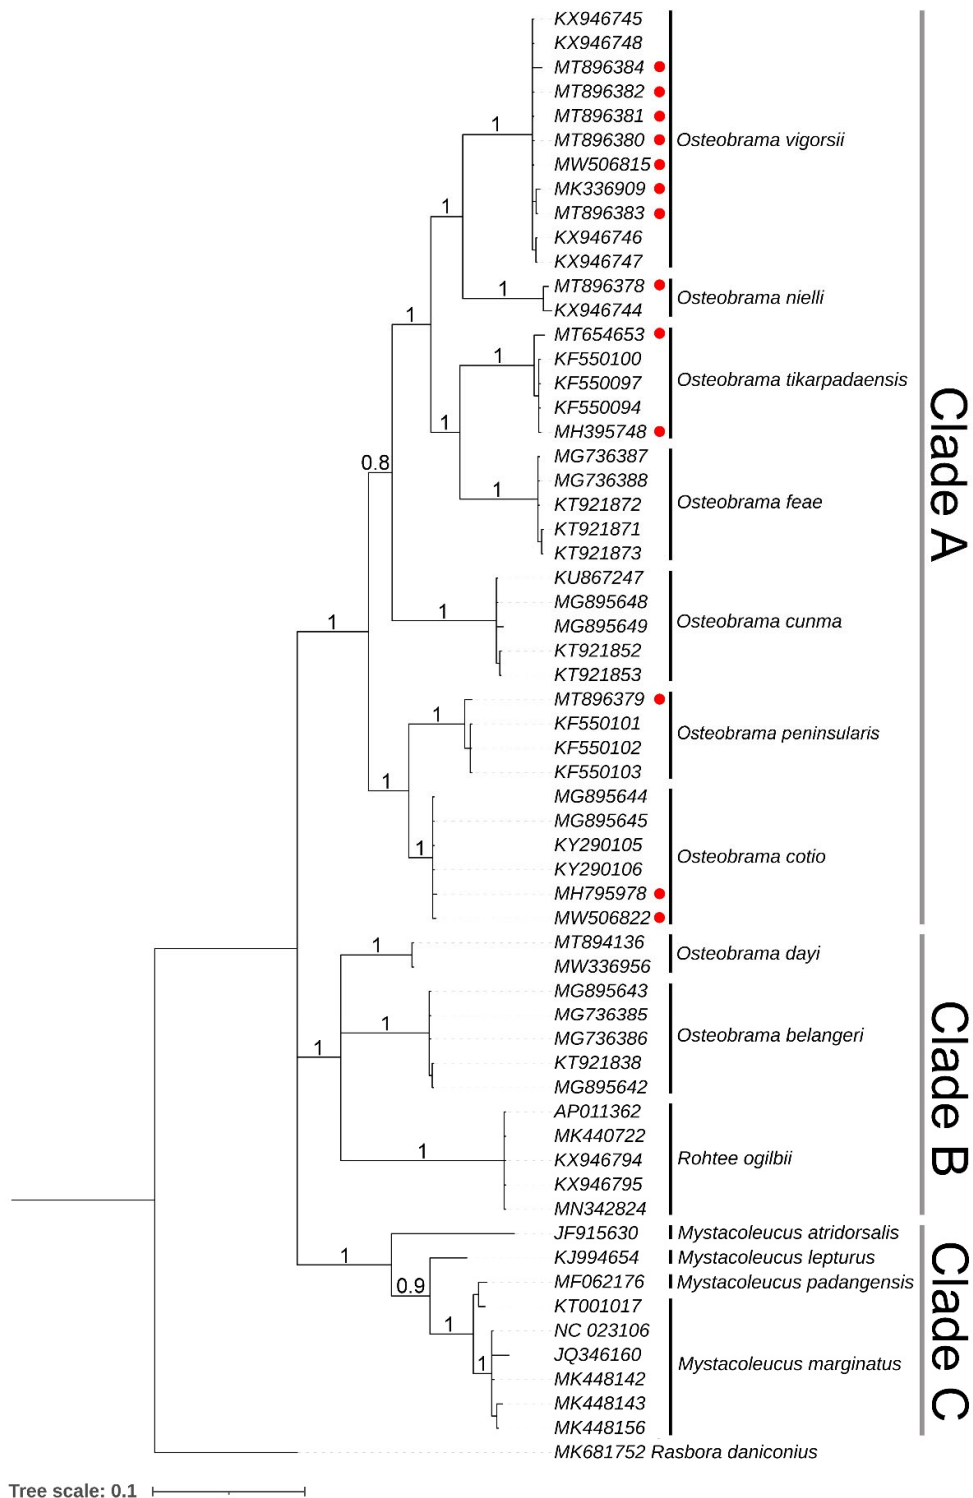

**Figure S2.** Bayesian phylogeny of *Osteobrama* congeners distinctly separating *O. vigorsii* and *O. tikarpadaensis*. The sequences generated in this study are highlighted with red dots, and the species names with their corresponding GenBank accession numbers are indicated on the tree. Posterior probability values are indicated at each node.
